---

## Congresses – Kongresse – Congrès

---

- 21.–22. Juni 1968     **Jahresversammlung der Schweizerischen Gesellschaft für Urologie 1968, gemeinsam mit der Schweizerischen Gesellschaft für Radiologie und Nuklearmedizin**  
in Freiburg, Schweiz  
*Hauptverhandlungsthemen:* 1. Die renovaskuläre Hypertonie. 2. Die Stenosen des Ureters in radiologischer und urologischer Sicht.  
*Sekretär:* Dr. G. RUTISHAUSER, Schweiz. Gesellschaft für Urologie, Bürgerspital Basel.
- June 24–29, 1968     **International Conference on Microcirculation** (5th Conference of the European Society for Microcirculation)  
at Gothenburg, Sweden  
Interdisciplinary approach to microcirculation, rheology and microcirculation, coagulation, fibrinolysis and microcirculation.  
*Informations:* Prof. LARS-ERIK GELIN, M.D., Surgical Dept. I, Sahlgrenska Sjukhuset, Gothenburg, Sweden.
- Juin 26–28, 1968     **15<sup>e</sup> Congrès de la Société d'Urologie de la Méditerranée Latine**  
à Santander, Espagne  
*Thème général:* Le cancer estrogène-résistant de la prostate. *Table Ronde:* La transplantation rénale.  
Drs. M. SORRENTINO, Italie; R. KÜSS et D. GRASSET, France; J. M. GIL-VERNET et A. CARALPS RIERA, Espagne.  
*Président:* Dr. J. PICATOSTE, Hôpital 'Valdecilla', Santander, Espagne.
- June 27–29, 1968     **Meeting of the British Association of Urological Surgeons**  
at Cardiff  
*Theme:* The Urethra.  
*Secretary:* J. F. R. WITHYCOMBE, M.S. F.R.C.S., The Royal College of Surgeons, Lincoln's Inn Fields, London W.C.2., England.
- September 9–12 1968     **Meeting of the South African Urological Association (S. Transvaal Branch), in the Kruger Game Reserve**  
*Theme:* Modern trends in urology:  
1. Renal failure and transplantation.  
2. Renovascular surgery.  
3. Urinary obstructions.  
*Congress Secretary:* Dr. CECIL M. WEINTRAUB, 301 Lancet Hall, Jeppe Street, Johannesburg.
- September 19–21 1968     **I. Swedish-Finnish-Czechoslovak Urological Symposium**  
at Bratislava, Czechoslovakia  
*Scientific Program:* 1. Adenoma of prostate, 2. Carcinoma prostate, 3. Problems of pediatric urology.

*Official languages:* English and German.

*Secretariat:* Department of Urology, Comenius University School of Medicine, Bratislava-Kramàre, Czechoslovakia.

September 26–28  
1968

**Congress of the Society of Hungarian Urologists and Nephrologists**

at Budapest

*Themes:* 1. Progress in the field of urological operations aiming at the conservation of organs.

2. To-day's problems of renal insufficiency, acute and chronic.

3. Andrological subjects:

a) Teratospermia/Genetics, Limits, Significance, Possibility of control.

b) Catamnetic data of descendants born after andrological medicinal treatment and interventions.

4. Free lectures and films on urology.

*Informations:* Dr. ZOLTAN SZENDRŐI, Senior University Lecturer, Budapest VIII, Üllői út 78/b.

Settembre 27–29  
1968

**Congresso XLI<sup>o</sup> della Società Italiana di Urologia**

a Fiuggi, Italia

*Temi di relazione:* 1. Fisiopatologia e terapia del rene unico (CACCHI e CONSTANTINI).

2. Fisiopatologia e terapia della vescica neurologica (ASCOLI, CARBONE, LASIO e ROCCA ROSETTI).

3. Simposio sulla emodialisi e sul trapianto renale.

*Segretaria del congresso:* Clinica Urologica dell'Università di Roma, Italia.

30 septembre au  
4 octobre 1968

**62<sup>e</sup> Congrès Français d'Urologie**

à Paris

1. *Rapport:* Les remplacements de l'uretère. M. LHEZ, Toulouse.

2. *Forum (sujet probable):* Les complications urétrovésicales de la chirurgie pelvipérinéale. M.R. COUVELAIRE, Paris, modérateur.

*Secrétaire général:* Dr. JACQUES MICHON, 42, boulevard des Invalides, Paris 7<sup>e</sup>, France.

23.–25. Oktober  
1968

**22. Tagung der Deutschen Gesellschaft für Urologie**

in Berlin, Deutschland.

*Themen:* 1. Urogenitaltuberkulose.

2. Die Blasenhalsostruktion.

3. Zystostatika in der Urologie.

4. Experimentelle Urologie.

5. Freie Vorträge.

6. Filme.

*Vorsitzender:* Prof. Dr. W. BROSIG, Urologische Klinik der Freien Universität Berlin, Spandauer Damm 130, D-1 Berlin 19, Deutschland.

October 27–29  
1968

**XI. Congress of the Polish Society of Urology**  
at Łódź, Poland

27.10.: Symposium: Cancer of the bladder.

28.10.: Recent advances in the urological radiodiagnostics.

29.10.: Organization of the urological health service and the urological teaching and training.

*Organizing Committee:* Prof. Dr. med. L. MAZUREK, Klinika Urologiczna AM, Kopcińskiego 22, Łódź, Poland.

---

## Varia

---

### Training Program in Reproductive Biology

Applications for postdoctoral fellowships in reproductive physiology at the Harbor General Hospital (University of California, Los Angeles) are now being accepted for the year beginning July 1, 1968.

The program, sponsored jointly by the U.S.P.H.S and the Ford Foundation, is designed to stress on interdisciplinary approach to the biology of early reproduction, from spermatogenesis through embryo development, and includes programs in electron microscopy, biochemistry and primate physiology. The first three months are devoted largely to didactic lectures and laboratory exercises oriented toward basic research techniques and concepts. The major portion of the year is devoted to research work under the supervision of a faculty member.

Basic research on the physiology, biochemistry, metabolism, pathology and ultrastructure of reproductive tissues is emphasized. Clinical research is not stressed, but the location of the program in a hospital makes such research possible.

United States citizenship is not required for fellows supported by the Ford Foundation. Fellows supported by the United States Public Health Service must be U.S. citizens or have permanent resident status.

Candidates should have the M.D. or the Ph.D. degree.

Inquiries should be addressed to A.T.K. COCKETT, M.D., Head, Department of Surgery/Urology, or DANIEL R. MISHALL, Jr., M.D., Department of Obstetrics and Gynecology, Harbor General Hospital, Torrance, California 90509 (USA).
